# Supplementary material for: Comparison of the cerebroprotective effect of inhalation anaesthesia and total intravenous anaesthesia in patients undergoing cardiac surgery with cardiopulmonary bypass: a systematic review and meta-analysis
Source: PubMed Central journal article supplement — BMJ Open. 2017 Oct 11;7(10):e014629. doi: 10.1136/bmjopen-2016-014629 (PMC5652618; doi:10.1136/bmjopen-2016-014629), 2017-10-11
Supplement: bmjopen-2016-014629supp001.pdf [file bmjopen-2016-014629supp001.pdf]

## **Appendix. MEDLINE search strategy**

#1 Heart surgery[MeSH] OR heart operation or cardiac surgery, valve replacement[MeSH] or Coronary artery bypass surgery[MeSH]

#2 Extracorporeal Circulation[MeSH] OR Circulation, Extracorporeal OR Circulations, Extracorporeal OR Extracorporeal Circulations

#3 Cardiopulmonary Bypass[MeSH] OR Bypass, Cardiopulmonary OR Bypasses, Cardiopulmonary OR Cardiopulmonary Bypasses

#4 Heart-Lung Bypass[MeSH] OR Bypass, Heart-Lung OR Bypasses, Heart-Lung OR Heart Lung Bypass OR Heart-Lung Bypasses

#5 #2 OR #3 OR #4

#6 cerebral protection[MeSH] OR Brain protection[MeSH] OR neuroprotection[MeSH]

#7 Anesthesia, Inhalation[MeSH] OR Inhalation Anesthesia OR Anesthesia, Insufflation

#8 Isoflurane OR Sevoflurane OR Enflurane OR Desflurane OR Halothane OR Nitrous Oxide OR Xenon

#9 #7 OR #8

#10 Anesthesia, Intravenous[MeSH] OR Anesthesias, Intravenous OR Intravenous Anesthesia OR Intravenous Anesthesias

#11 Propofol[MeSH] OR Disoprofol

#12 Etomidate[MeSH] OR Ethomidate;

# 13 Thiopental[MeSH] OR Penthiobarbital OR Thiomebumal OR

Thiopentobarbital OR Thiopentone OR Bomathal OR Pentothal Sodico

#14 Ketamine[MeSH] OR Calypsol OR Kalips

#15 Midazolam[MeSH] OR Hydrochloride, Midazolam OR Maleate,  
Midazolam

#16 OR/#10-#15

#17 randomized controlled trial [pt]

#18 controlled clinical trial [pt]

#19 randomized [tiab]

#20 placebo [tiab]

#21 drug therapy [sh]

#22 randomly [tiab]

#23 trial [tiab]

#24 groups [tiab]

#25 OR/#17-#24

#26 animals [mh] NOT humans [mh]

#27 #25 NOT #26

#28 #1 AND #5 AND #9 AND #16 AND #27
